# Supplementary material
Source: HighWire-hosted journal article supplement (https://erj.ersjournals.com/content/56/3/1901875)
Supplement: inline-supplementary-material-1 [file inline-supplementary-material-1.pdf]

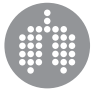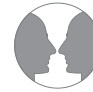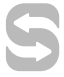

SHAREABLE PDF

# The impact of different antibiotic treatment regimens on mortality in *Mycobacterium avium* complex pulmonary disease: a population-based cohort study

Sarah K. Brode<sup>1,2,3,4</sup>, Hannah Chung<sup>4</sup>, Michael A. Campitelli<sup>4</sup>, Jeffrey C. Kwong<sup>4,5,6,7,8</sup>, Rinku Sutradhar<sup>4,7</sup>, Alex Marchand-Austin<sup>5</sup>, Kevin L. Winthrop<sup>9</sup>, Frances B. Jamieson<sup>5,10</sup> and Theodore K. Marras<sup>1,2</sup>

**Affiliations:** <sup>1</sup>Division of Respiriology, Dept of Medicine, University of Toronto, Toronto, ON, Canada. <sup>2</sup>Dept of Medicine, University Health Network and Mount Sinai Hospital, Toronto, ON, Canada. <sup>3</sup>Division of Respiratory Medicine, West Park Healthcare Centre, Toronto, ON, Canada. <sup>4</sup>ICES, Toronto, ON, Canada. <sup>5</sup>Public Health Ontario, Toronto, ON, Canada. <sup>6</sup>Dept of Family and Community Medicine, University of Toronto, Toronto, ON, Canada. <sup>7</sup>Dalla Lana School of Public Health, University of Toronto, Toronto, ON, Canada. <sup>8</sup>Centre for Vaccine Preventable Diseases, University of Toronto, Toronto, ON, Canada. <sup>9</sup>Oregon Health and Science University, Portland, OR, USA. <sup>10</sup>Dept of Laboratory Medicine and Pathobiology, University of Toronto, Toronto, ON, Canada.

**Correspondence:** Sarah K. Brode, University Health Network and Mount Sinai Hospital, Dept of Medicine, Division of Respiriology, Toronto Western Hospital, 399 Bathurst St. 7E-453, Toronto, ON M5T 2S8, Canada. E-mail: sarah.brode@uhn.ca

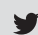

@ERSpublications

**No significant difference in mortality among patients treated with different antibiotic regimens for *Mycobacterium avium* pulmonary disease** <https://bit.ly/3abXjDJ>

**Cite this article as:** Brode SK, Chung H, Campitelli MA, *et al.* The impact of different antibiotic treatment regimens on mortality in *Mycobacterium avium* complex pulmonary disease: a population-based cohort study. *Eur Respir J* 2020; 56: 1901875 [<https://doi.org/10.1183/13993003.01875-2019>].

This single-page version can be shared freely online.

*To the Editor:*

Evidence-based guidelines recommend the combination of macrolide–ethambutol–rifamycin as first-line treatment for *Mycobacterium avium* complex pulmonary disease (MAC-PD) [1]. Whether this regimen results in improved survival is unknown.
